# Supplementary material for: Energetics and kinetics of phase transition between a 2H and a 1T MoS2monolayer—a theoretical study
Source: Royal Society of Chemistry journal article supplement (doi:10.1039/c6nr08628d), 2017-01-01
Supplement: c6nr08628d1.pdf [file c6nr08628d1.pdf]

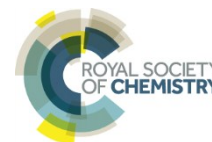

## Supplementary Information

Received 00th January 20xx,  
Accepted 00th January 20xx

DOI: 10.1039/x0xx00000x

www.rsc.org/nanoscale

## Energetics and Kinetics of Phase Transition Between 2H and 1T MoS<sub>2</sub> Monolayer—a Theoretical Study

Wen Zhao<sup>a</sup> and Feng Ding<sup>a\*</sup>

### S1. Introduction The stability and the boundaries between 2H and 1T' phases

In equilibrium, an obvious initial concern is the structure and the lowest ground-state energy of the boundary, which readily yields the thermodynamically optimal shape using the Wulff construction. The stability of the boundaries is evaluated by their formation energy per unit length ( $\gamma_b$ ), using the fitted value based on DFT calculations.  $\gamma_b$  is calculated as follows.

- (i) We denote  $l$  as the length of the boundary and  $\Delta m$  as the number of S atoms lost to ( $\Delta m < 0$ ) or gained ( $\Delta m > 0$ ) from the feedstock. So the formation energy  $G_f$  of a triangular 1T phase inside the 2H monolayer is

$$G_f = E + \Delta m \times \mu_S - E_{2H} \quad (S1)$$

where  $E$  and  $E_{2H}$  are the DFT energies of the 2H monolayer with and without 1T phase inside, respectively, and  $\mu_S$  is the chemical potential of the S feedstock.

- (ii)  $G_f$  can be viewed as contributed by three parts, i.e., the three vertices of the triangle ( $\varepsilon_v$ ), the three boundaries ( $\gamma_b$ ), and the 1T phase inside ( $\delta$ ) whose area is  $\sqrt{3}l^2/4$ .

$$G_f = 3\varepsilon_v + 3l\gamma_b + \frac{\sqrt{3}}{4}l^2\delta \quad (S2)$$

- (iii) For each kind of boundaries, we construct several (at least three) structures with different sizes (the number  $n$  of honeycombs along one side,  $l = l(n)$ ) and calculate their corresponding  $E_f$ , then we can fit those value and obtain  $\gamma_b$  and  $\delta$ . In detail, we denote the lattice vector of MoS<sub>2</sub> monolayer (or the Mo-Mo distance) as  $a$ . For AC boundaries, we have  $l = \sqrt{3}na - 2a/\sqrt{3}$ , while for ZZ boundaries,  $l = na$ .

As the boundary length ( $n$ ) increases, the number of S atoms ( $\Delta m$ ) departed from stoichiometry also increases, following a linear relationship ( $k_1$  and  $k_2$  are parameters)

$$\Delta m = k_1n + k_2 \quad (S3)$$

- (iv) Combining the equations above, we can get ( $A$ ,  $B$ , and  $C$  are fitting parameters)

$$E - E_{2H} = An^2 + Bn + C \quad (S4)$$

For AC boundaries,

$$\begin{aligned} A &= \frac{3\sqrt{3}}{4}a^2\delta \\ B &= 3\sqrt{3}a\gamma_b - k_1\mu_S - \sqrt{3}a^2\delta \\ C &= 3\varepsilon_v - k_2\mu_S - 2\sqrt{3}a\delta + \frac{a^2\delta}{\sqrt{3}} \end{aligned} \quad (S5a)$$

For ZZ boundaries,

$$\begin{aligned} A &= \frac{\sqrt{3}}{4}a^2\delta \\ B &= 3a\gamma_b - k_1\mu_S \\ C &= 3\varepsilon_v - k_2\mu_S \end{aligned} \quad (S5b)$$

<sup>a</sup> Institute of Textiles and Clothing, Hong Kong Polytechnic University, Hong Kong, China.  
E-mail: feng.ding@polyu.edu.hk

(v) Then we can finally get the formation energy of the boundaries:

$$\gamma_b(AC) = \frac{B + k_1\mu_S + \sqrt{3}a^2\delta}{3\sqrt{3}a} \quad (\text{S6a})$$

$$\gamma_b(ZZ) = \frac{B + k_1\mu_S}{3a} \quad (\text{S6b})$$

## S2. Nucleation of 1T phase inside 2H phase

**Table S1.** The parameters fitted from DFT energies ( $A$ ,  $B$ , and  $C$ ) and structures ( $k_1$ ,  $k_2$ ,  $A'$ ,  $B'$ , and  $C'$ ).  $\delta$  is in the unit of eV/Å<sup>2</sup>.  $\Delta\mu_c$  is in the unit of eV/MoS<sub>2</sub>.

|                | $E - E_{2H} = An^2 + Bn + C$ |        |         | $\delta$ | $\Delta m = k_1n + k_2$ |       | $N_{1T} = A'n^2 + B'n + C'$ |      |      | $\Delta\mu_c$ |
|----------------|------------------------------|--------|---------|----------|-------------------------|-------|-----------------------------|------|------|---------------|
|                | $A$                          | $B$    | $C$     |          | $k_1$                   | $k_2$ | $A'$                        | $B'$ | $C'$ |               |
| <b>ZZ-Mo -</b> | 0.287                        | 5.731  | 1.911   | 0.065    | 1                       | 0     | 0.5                         | -0.5 | 0    | 0.573         |
| <b>ZZ-Mo +</b> | 0.195                        | -4.524 | 29.405  | 0.044    | -2                      | 12    | 0.5                         | -0.5 | -9   | 0.390         |
| <b>ZZ-S -</b>  | 0.237                        | 13.771 | -21.793 | 0.054    | 2                       | -3    | 0.5                         | -0.5 | -9   | 0.474         |
| <b>ZZ-S +</b>  | 0.226                        | -1.401 | 14.678  | 0.051    | -1                      | 7     | 0.5                         | -0.5 | -9   | 0.452         |
| <b>AC -</b>    | 0.758                        | 18.820 | -5.006  | 0.057    | 3                       | -1    | 1.5                         | -1.5 | 1    | 0.505         |
| <b>AC +</b>    | 0.842                        | 5.692  | 7.549   | 0.063    | 0                       | 2     | 1.5                         | 1.5  | -2   | 0.561         |

The change in Gibbs free energy  $G_f$  as a function of the nucleus size  $n$  or  $N_{1T}$  dominates the behavior of nucleation. Then from  $G_f$  in Eq. (3) in the main text, we can furthermore analyze how a 1T phase nucleates inside a 2H lattice. Now we focus on the nuclei with ZZ-Mo|- and ZZ-S|+ boundaries, which has lower formation energy and then higher chance to present. Since the number of S atoms hoped to 1T phase ( $N_{1T}$ ) has a polynomial relationship with  $n$  ( $N_{1T} = An^2 + Bn + C$ ), all the coefficients listed in Table S1.), we can rewrite  $G_f$  in Eq. (3) and (S4) as

$$G_f = (A - A'\Delta\mu)n^2 + (B - B'\Delta\mu + k_1\mu_S)n + (C - C'\Delta\mu + k_2\mu_S) \quad (\text{S7})$$

and  $N_{1T}$  is the number of the top-layer S atoms in the 1T phase which is proportional to the area of the 1T phase in the 2H lattice and represents the size of the 1T phase.  $\Delta\mu$  is the chemical potential difference between 1T and 2H phases.

In eq.(3),  $G_f = E + \Delta m \times \mu_S - E_{2H} - N_{1T}\Delta\mu$ , the term  $-N_{1T}\Delta\mu$ , represents the formation energy drop of the nucleated 1T' phase as a result of doping or charge transfer. It will affect the stability of different boundaries accordingly:

$$\gamma_b(AC) = \frac{B - B'\Delta\mu + k_1\mu_S + \sqrt{3}a^2\delta}{3\sqrt{3}a} \quad (\text{S8a})$$

$$\gamma_b(ZZ) = \frac{B - B'\Delta\mu + k_1\mu_S}{3a} \quad (\text{S8b})$$

Note that the parameter  $B'$  is the same for ZZ boundaries as shown in Table S1, therefore, the driving force  $\Delta\mu$  will not affect the relative stability between ZZ boundaries.

The nucleus size and nucleation barrier ( $n^*$ ,  $G^*$ ), are defined as the maximum of the  $G_f(n)$  curve at a given  $\Delta\mu$  and  $\mu_S$ .

Following this definition, we can easily determine  $G^*$  and  $n^*$  as a function of  $\Delta\mu$  at a given  $\mu_S$ , through  $\frac{\partial G}{\partial n}\bigg|_{n=n^*} = 0$ , and

$$\frac{\partial^2 G}{\partial n^2}\bigg|_{n=n^*} < 0$$

$$n^* = \frac{B - B'\Delta\mu + k_1\mu_S}{2(A'\Delta\mu - A)}, \Delta\mu > \Delta\mu_c = \frac{A}{A'}$$

$$G^* = \frac{(B - B'\Delta\mu + k_1\mu_S)^2}{4(A'\Delta\mu - A)} + (C - C'\Delta\mu + k_2\mu_S) \quad (\text{S9})$$

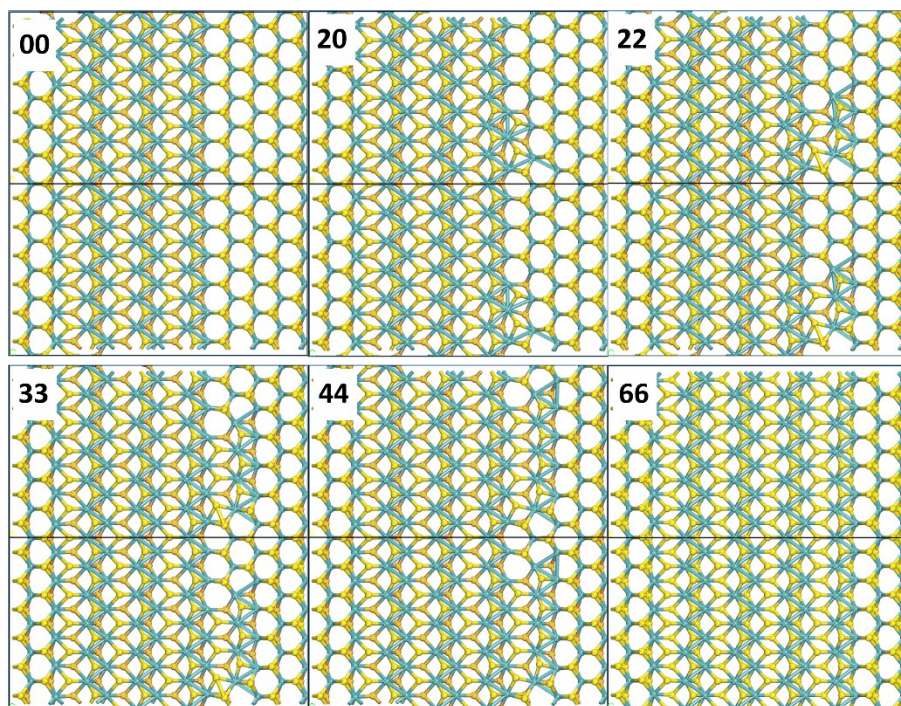

**Figure S1.** The step-flow model at the ZZ-Mo|- boundary. The migrated S atoms in both rows  $(i,j) = (0,0), (2,0), (2,2), (3,3), (4,4)$  and  $(6,6)$  respectively.  $2 \times 2$  supercells are used in all figures to show the structures clearly.

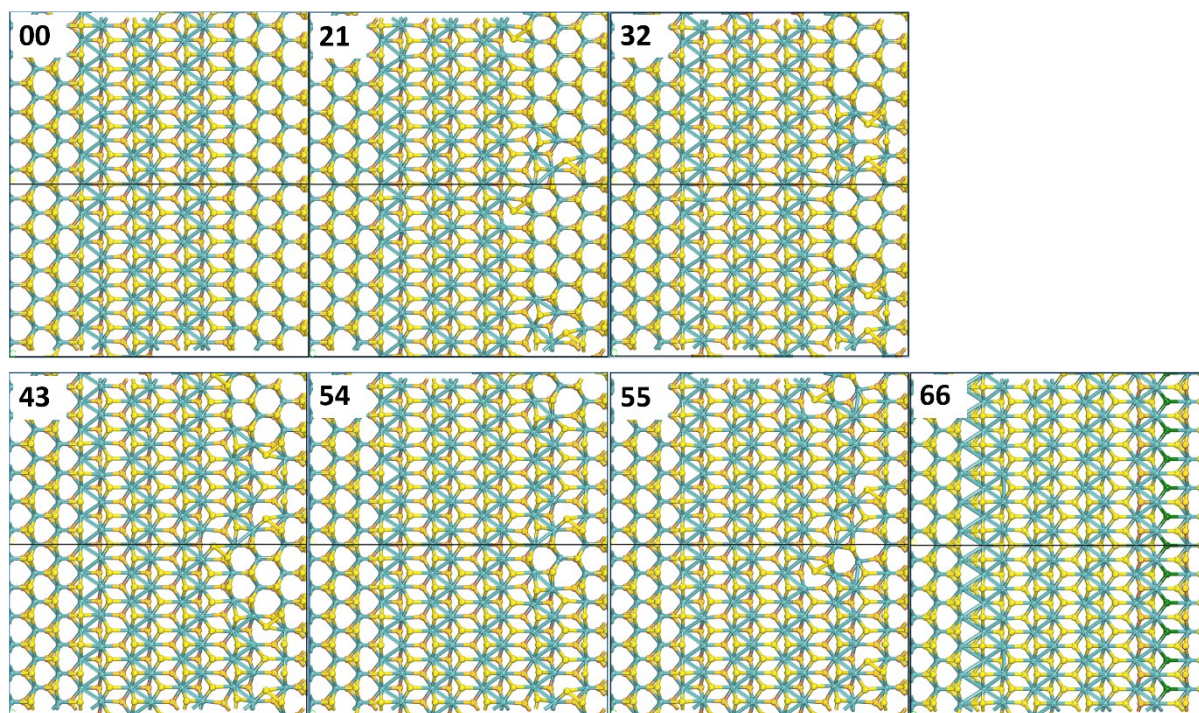

**Figure S2.** The step-flow model at the ZZ-Mo|+ boundary. The migrated S atoms in both rows  $(i,j) = (0,0), (2,1), (3,2), (4,3), (5,4), (5,5)$  and  $(6,6)$ , respectively.

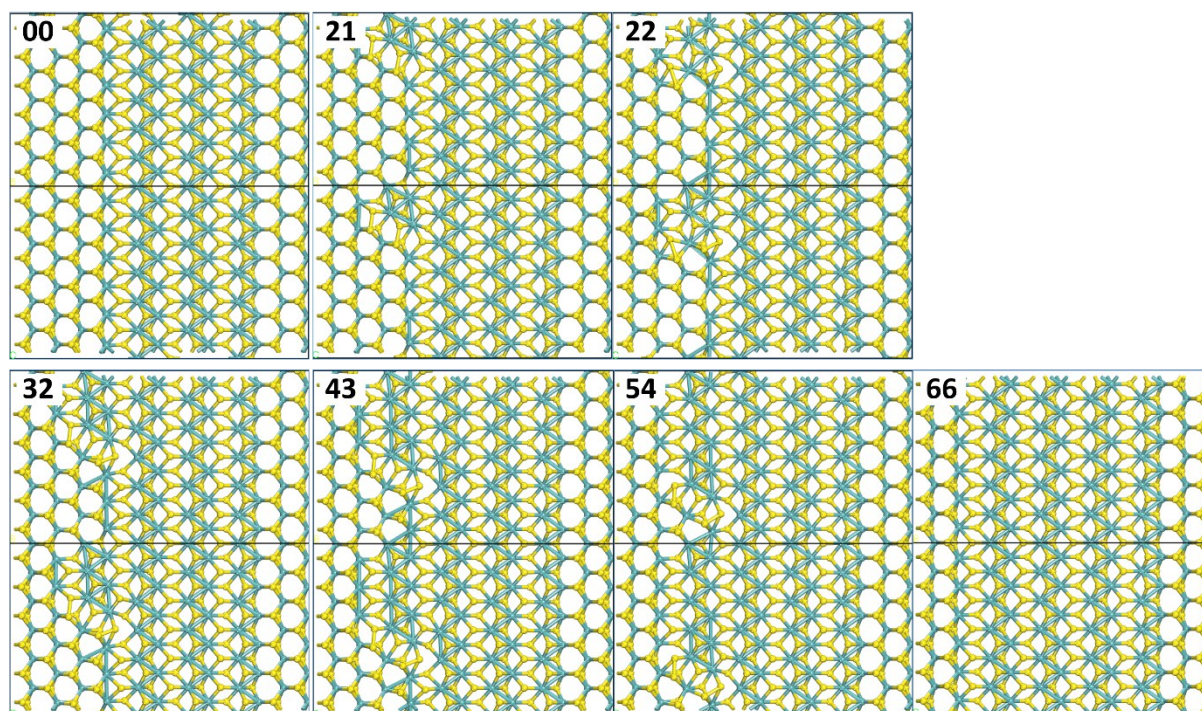

**Figure S3.** The step-flow model at the ZZ-S|+ boundary. The migrated S atoms in both rows  $(i,j) = (0,0), (2,1), (2,2), (3,2), (4,3), (5,4)$  and  $(6,6)$  respectively.
